# Supplementary material for: Construction of g-C3N4 and FeWO4 Z-scheme photocatalyst: effect of contact ways on the photocatalytic performance
Source: Royal Society of Chemistry journal article supplement (doi:10.1039/c8ra02882f), 2018-01-01
Supplement: c8ra02882f1.pdf [file c8ra02882f1.pdf]

Supporting Information for  
Construction of g-C<sub>3</sub>N<sub>4</sub> and FeWO<sub>4</sub> Z-scheme photocatalyst: Effect of  
contact ways on the photocatalytic performance

Cong Wang<sup>1</sup>, Guanlong Wang<sup>1</sup>, Xiufang Zhang\*, Xiaoli Dong, Chun Ma, Xinxin Zhang,  
Hongchao Ma, Mang Xue

*School of Light Industry and Chemical Engineering, Dalian Polytechnic University, Dalian,  
China, 116034.*

\*Corresponding authors. Tel.: +86 411 86323508; fax: +86 411 86323736.

E-mail address: zhangxf010807@163.com.

<sup>1</sup> These two authors contributed equally to this work

**Table S1.** The element composition of the materials (wt%).

| Element                                                | C     | N     | O     | Fe   | W     |
|--------------------------------------------------------|-------|-------|-------|------|-------|
| g-C <sub>3</sub> N <sub>4</sub>                        | 64.00 | 36.00 |       |      |       |
| FeWO <sub>4</sub> -RGO/g-C <sub>3</sub> N <sub>4</sub> | 19.47 | 23.95 | 12.82 | 9.84 | 33.92 |
| RGO/FeWO <sub>4</sub> -g-C <sub>3</sub> N <sub>4</sub> | 29.79 | 38.99 | 7.12  | 5.36 | 18.74 |

The influence of RGO content.

The RGO content in RGO/FeWO<sub>4</sub>-g-C<sub>3</sub>N<sub>4</sub> was varied by adding different mass of RGO (7 mg, 14 mg and 28 mg per 200 mg RGO/FeWO<sub>4</sub>-g-C<sub>3</sub>N<sub>4</sub>) in the prepared process. As shown in the figure below, the RGO/FeWO<sub>4</sub>-g-C<sub>3</sub>N<sub>4</sub> with 14 mg RGO addition performed best. Based on the results, it could be speculated that the performance RGO/FeWO<sub>4</sub>-g-C<sub>3</sub>N<sub>4</sub> was enhanced with the increase of RGO, because the RGO is beneficial for electron transfer from CB of the FeWO<sub>4</sub> to the VB of the g-C<sub>3</sub>N<sub>4</sub>. However, the excess RGO would obstruct the light adsorption of FeWO<sub>4</sub>, thus resulting in the performance decrease.

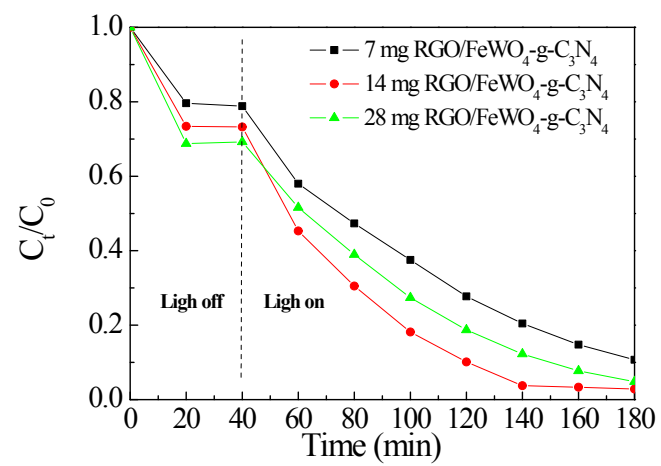

Fig S1. Photocatalytic degradation of RhB on RGO/FeWO<sub>4</sub>-g-C<sub>3</sub>N<sub>4</sub> with different RGO content under visible light.



Fig. S2. (a) Quenching effects of EDTA, BQ and t-BuOH on the photocatalytic RhB degradation.  
(b) the kinetic constant of RhB degradation in the presence of different scavengers.
